# Supplementary material for: CRISPR-Cas9 editing of TNFAIP3 variants in salivary gland epithelial cells to study Sjögren’s disease pathogenesis
Source: Front Genome Ed. 2025 Jul 23;7:1625393. doi: 10.3389/fgeed.2025.1625393 (PMC12326134; doi:10.3389/fgeed.2025.1625393)
Supplement: Supplementary file 1 [file Table2.xlsx]

## Sheet: SGEC 1
Target	Sample	Cq	Avg. Cq	SD		Target	Sample	dCq	ddCq	Fold change	SD
GAPDH	SGEC Cont.	15.9064				TNFAIP3	SGEC Cont.	6.37563		1	0.210804
GAPDH	SGEC Cont.	16.0133				TNFAIP3	SGEC(A/G)	7.33459	0.95896	0.514428	0.19677
GAPDH	SGEC Cont.	15.84	15.9199	0.0874615		TNFAIP3	SGEC(T/C/G)	6.5589	0.183266	0.880707	0.472367
GAPDH	SGEC(A/G)	15.9211				IL-Beta	SGEC Cont.	7.45996		1	0.242652
GAPDH	SGEC(A/G)	15.3429				IL-Beta	SGEC(A/G)	10.3461	2.88618	0.135262	1.70537
GAPDH	SGEC(A/G)	15.1699	15.478	0.39341		IL-Beta	SGEC(T/C/G)	8.46036	1.0004	0.499861	0.540073
GAPDH	SGEC(T/C/G)	15.4987				IL-6	SGEC Cont.	4.80299		1	0.0702352
GAPDH	SGEC(T/C/G)	15.0543				IL-6	SGEC(A/G)	3.66816	-1.13483	2.19592	0.125177
GAPDH	SGEC(T/C/G)	14.8152	15.1228	0.346872		IL-6	SGEC(T/C/G)	3.61571	-1.18728	2.27722	0.284978
TNFAIP3	SGEC Cont.	22.5089				IL-8	SGEC Cont.	10.4664		1	2.54619
TNFAIP3	SGEC Cont.	22.2904				IL-8	SGEC(A/G)	7.27741	-3.18902	9.11991	0.492138
TNFAIP3	SGEC Cont.	22.0874	22.2955	0.210804	6.37563	IL-8	SGEC(T/C/G)	6.65306	-3.81337	14.0585	0.53681
TNFAIP3	SGEC(A/G)	22.6088				PKR	SGEC Cont.	2.96631		1	0.257655
TNFAIP3	SGEC(A/G)	22.8274				PKR	SGEC(A/G)	3.43551	0.4692	0.722365	0.112549
TNFAIP3	SGEC(A/G)	23.0015	22.8126	0.19677	7.33459	PKR	SGEC(T/C/G)	3.51638	0.550068	0.682988	0.0870003
TNFAIP3	SGEC(T/C/G)	22.2228				IRF-5	SGEC Cont.	13.2172		1	0.178593
TNFAIP3	SGEC(T/C/G)	21.4699				IRF-5	SGEC(A/G)	14.0619	0.844709	0.556823	0.29355
TNFAIP3	SGEC(T/C/G)	21.3522	21.6816	0.472367	6.5589	IRF-5	SGEC(T/C/G)	13.8353	0.618085	0.651535	0.431287
IL-Beta	SGEC Cont.	23.3843				CXCL10	SGEC Cont.	16.9588		1	0.679836
IL-Beta	SGEC Cont.	23.6204				CXCL10	SGEC(A/G)	17.7871	0.828307	0.56319	0.816366
IL-Beta	SGEC Cont.	23.1351	23.38	0.242652	7.45996	CXCL10	SGEC(T/C/G)	17.8697	0.910828	0.53188	0.374131
IL-Beta	SGEC(A/G)	27.7414				NF-kB	SGEC Cont.	3.96084		1	0.115719
IL-Beta	SGEC(A/G)	25.265				NF-kB	SGEC(A/G)	4.28776	0.326926	0.797233	0.113342
IL-Beta	SGEC(A/G)	24.472	25.8261	1.70537	10.3461	NF-kB	SGEC(T/C/G)	4.35277	0.391931	0.762109	0.0373754
IL-Beta	SGEC(T/C/G)	24.2036
IL-Beta	SGEC(T/C/G)	23.2504
IL-Beta	SGEC(T/C/G)	23.287	23.5804	0.540073	8.46036
IL-6	SGEC Cont.	20.6499
IL-6	SGEC Cont.	20.7291
IL-6	SGEC Cont.	20.7899	20.723	0.0702352	4.80299
IL-6	SGEC(A/G)	19.0116
IL-6	SGEC(A/G)	19.1756
IL-6	SGEC(A/G)	19.2574	19.1482	0.125177	3.66816
IL-6	SGEC(T/C/G)	19.0004
IL-6	SGEC(T/C/G)	18.7727
IL-6	SGEC(T/C/G)	18.434	18.7357	0.284978	3.61571
IL-8	SGEC Cont.	28.2871
IL-8	SGEC Cont.	23.4935
IL-8	SGEC Cont.	27.3786	26.3864	2.54619	10.4664
IL-8	SGEC(A/G)	22.2643
IL-8	SGEC(A/G)	23.2485
IL-8	SGEC(A/G)	22.7594	22.7574	0.492138	7.27741
IL-8	SGEC(T/C/G)	21.1691
IL-8	SGEC(T/C/G)	22.196
IL-8	SGEC(T/C/G)	21.9541	21.7731	0.53681	6.65306
PKR	SGEC Cont.	19.0391
PKR	SGEC Cont.	19.031
PKR	SGEC Cont.	18.5888	18.8863	0.257655	2.96631
PKR	SGEC(A/G)	18.7969
PKR	SGEC(A/G)	19.0209
PKR	SGEC(A/G)	18.9287	18.9155	0.112549	3.43551
PKR	SGEC(T/C/G)	18.7044
PKR	SGEC(T/C/G)	18.6664
PKR	SGEC(T/C/G)	18.5383	18.6364	0.0870003	3.51638
IRF-5	SGEC Cont.	29.144
IRF-5	SGEC Cont.	29.3122
IRF-5	SGEC Cont.	28.9552	29.1372	0.178593	13.2172
IRF-5	SGEC(A/G)	29.8261
IRF-5	SGEC(A/G)	29.5598
IRF-5	SGEC(A/G)	29.2398	29.5419	0.29355	14.0619
IRF-5	SGEC(T/C/G)	29.2913
IRF-5	SGEC(T/C/G)	28.4689
IRF-5	SGEC(T/C/G)	29.1055	28.9553	0.431287	13.8353
CXCL10	SGEC Cont.	32.0939
CXCL10	SGEC Cont.	33.2796
CXCL10	SGEC Cont.	33.263	32.8788	0.679836	16.9588
CXCL10	SGEC(A/G)	34.1083
CXCL10	SGEC(A/G)	32.478
CXCL10	SGEC(A/G)	33.2152	33.2671	0.816366	17.7871
CXCL10	SGEC(T/C/G)	33.0415
CXCL10	SGEC(T/C/G)	33.3352
CXCL10	SGEC(T/C/G)	32.5923	32.9897	0.374131	17.8697
NF-kB	SGEC Cont.	20.0081
NF-kB	SGEC Cont.	19.7819
NF-kB	SGEC Cont.	19.8525	19.8808	0.115719	3.96084
NF-kB	SGEC(A/G)	19.7206
NF-kB	SGEC(A/G)	19.8971
NF-kB	SGEC(A/G)	19.6856	19.7678	0.113342	4.28776
NF-kB	SGEC(T/C/G)	19.4934
NF-kB	SGEC(T/C/G)	19.4953
NF-kB	SGEC(T/C/G)	19.4296	19.4728	0.0373754	4.35277
OAS1	SGEC Cont.	37.1673
OAS1	SGEC Cont.	37.6124
OAS1	SGEC Cont.	38.792
OAS1	SGEC(A/G)	39.2284
OAS1	SGEC(A/G)	36.4411
OAS1	SGEC(A/G)	36.3204
OAS1	SGEC(T/C/G)	38.2416
OAS1	SGEC(T/C/G)
OAS1	SGEC(T/C/G)	38.2303
IL10	SGEC Cont.
IL10	SGEC Cont.	32.6432
IL10	SGEC Cont.	32.0299
IL10	SGEC(A/G)	32.0969
IL10	SGEC(A/G)	33.3993
IL10	SGEC(A/G)	33.3658
IL10	SGEC(T/C/G)	30.8614
IL10	SGEC(T/C/G)	31.2015
IL10	SGEC(T/C/G)	32.2589
IL12	SGEC Cont.	31.7377
IL12	SGEC Cont.	32.5777
IL12	SGEC Cont.	33.4089
IL12	SGEC(A/G)	31.2685
IL12	SGEC(A/G)	30.7932
IL12	SGEC(A/G)	30.1298
IL12	SGEC(T/C/G)	30.3192
IL12	SGEC(T/C/G)	30.2333
IL12	SGEC(T/C/G)	29.9397
IL13	SGEC Cont.	35.1658
IL13	SGEC Cont.
IL13	SGEC Cont.	36.3155
IL13	SGEC(A/G)	33.8028
IL13	SGEC(A/G)	38.9965
IL13	SGEC(A/G)	33.7395
IL13	SGEC(T/C/G)	33.207
IL13	SGEC(T/C/G)	34.7987
IL13	SGEC(T/C/G)	34.557

## Sheet: SGEC 2
Target	Sample	Cq	Avg. Cq	SD	Sample	Target	Cq		dCq	ddCq	Fold change	SD
OAS1	SGEC Cont.	37.1673
OAS1	SGEC Cont.	37.6124			SGEC Cont.	GAPDH	15.9199
OAS1	SGEC Cont.	38.792	37.8572	0.83953	SGEC(A/G)	GAPDH	15.478
OAS1	SGEC(A/G)	39.2284			SGEC(T/C/G)	GAPDH	15.1228
OAS1	SGEC(A/G)	36.4411			SGEC Cont.	OAS1	37.8572		21.9373		1
OAS1	SGEC(A/G)	36.3204	37.33	1.64521	SGEC(A/G)	OAS1	37.33		21.852	-0.0853387	1.06094	1.64521
OAS1	SGEC(T/C/G)	38.2416			SGEC(T/C/G)	OAS1	38.236		23.1132	1.17589	0.442609	0.00800813
OAS1	SGEC(T/C/G)				SGEC Cont.	IL10	32.3365		16.4166		1
OAS1	SGEC(T/C/G)	38.2303	38.236	0.00800813	SGEC(A/G)	IL10	32.954		17.476	1.05942	0.479824	0.742486
IL10	SGEC Cont.				SGEC(T/C/G)	IL10	31.4406		16.3178	-0.0987836	1.07087	0.728783
IL10	SGEC Cont.	32.6432			SGEC Cont.	IL12	32.5748		16.6549		1
IL10	SGEC Cont.	32.0299	32.3365	0.43367	SGEC(A/G)	IL12	30.7305		15.2525	-1.40234	2.6433	0.57193
IL10	SGEC(A/G)	32.0969			SGEC(T/C/G)	IL12	30.1641		15.0413	-1.61354	3.06002	0.198988
IL10	SGEC(A/G)	33.3993			SGEC Cont.	IL13	35.7407		19.8208		1
IL10	SGEC(A/G)	33.3658	32.954	0.742486	SGEC(A/G)	IL13	35.5129		20.0349	0.214166	0.862044	3.017
IL10	SGEC(T/C/G)	30.8614			SGEC(T/C/G)	IL13	34.1876		19.0648	-0.755944	1.68874	0.857786
IL10	SGEC(T/C/G)	31.2015			SGEC Cont.	TGF-B	19.1557		3.23581		1
IL10	SGEC(T/C/G)	32.2589	31.4406	0.728783	SGEC(A/G)	TGF-B	18.9603		3.48228	0.246473	0.842955	0.096597
IL12	SGEC Cont.	31.7377			SGEC(T/C/G)	TGF-B	18.7575		3.63473	0.398919	0.758426	0.166137
IL12	SGEC Cont.	32.5777			SGEC Cont.	IRF-1	20.4191		4.49922		1
IL12	SGEC Cont.	33.4089	32.5748	0.835641	SGEC(A/G)	IRF-1	20.3675		4.88953	0.390308	0.762966	0.0969247
IL12	SGEC(A/G)	31.2685			SGEC(T/C/G)	IRF-1	19.8764		4.75366	0.254435	0.838315	0.105946
IL12	SGEC(A/G)	30.7932			SGEC Cont.	IL4	33.2448		17.3249		1
IL12	SGEC(A/G)	30.1298	30.7305	0.57193	SGEC(A/G)	IL4	33.4618		17.9838	0.658937	0.633345	0.921081
IL12	SGEC(T/C/G)	30.3192			SGEC(T/C/G)	IL4	32.7689		17.6462	0.321292	0.800353	0.487041
IL12	SGEC(T/C/G)	30.2333
IL12	SGEC(T/C/G)	29.9397	30.1641	0.198988
IL13	SGEC Cont.	35.1658
IL13	SGEC Cont.
IL13	SGEC Cont.	36.3155	35.7407	0.812935
IL13	SGEC(A/G)	33.8028
IL13	SGEC(A/G)	38.9965
IL13	SGEC(A/G)	33.7395	35.5129	3.017
IL13	SGEC(T/C/G)	33.207
IL13	SGEC(T/C/G)	34.7987
IL13	SGEC(T/C/G)	34.557	34.1876	0.857786

## Sheet: SGEC 3
Target	Sample	Cq	Avg. Cq	SD
TGF-B	SGEC Cont.	19.5816
TGF-B	SGEC Cont.	19.0067
TGF-B	SGEC Cont.	18.8788	19.1557	0.374358
TGF-B	SGEC(A/G)	19.0634
TGF-B	SGEC(A/G)	18.8718
TGF-B	SGEC(A/G)	18.9456	18.9603	0.096597
TGF-B	SGEC(T/C/G)	18.9219
TGF-B	SGEC(T/C/G)	18.7609
TGF-B	SGEC(T/C/G)	18.5896	18.7575	0.166137
IRF-1	SGEC Cont.	20.7075
IRF-1	SGEC Cont.	20.3787
IRF-1	SGEC Cont.	20.1711	20.4191	0.270487
IRF-1	SGEC(A/G)	20.4742
IRF-1	SGEC(A/G)	20.285
IRF-1	SGEC(A/G)	20.3434	20.3675	0.0969247
IRF-1	SGEC(T/C/G)	19.916
IRF-1	SGEC(T/C/G)	19.9568
IRF-1	SGEC(T/C/G)	19.7564	19.8764	0.105946
IL4	SGEC Cont.	32.5399
IL4	SGEC Cont.	32.6694
IL4	SGEC Cont.	34.5251	33.2448	1.11063
IL4	SGEC(A/G)	32.4168
IL4	SGEC(A/G)	33.8132
IL4	SGEC(A/G)	34.1555	33.4618	0.921081
IL4	SGEC(T/C/G)	33.0496
IL4	SGEC(T/C/G)	33.0506
IL4	SGEC(T/C/G)	32.2065	32.7689	0.487041

## Sheet: Jurkat 1
Target	Sample	Cq	Avg. Cq	SD		Target	Sample	dCq	ddCq	Fold change	SD
GAPDH	Jurkat Cont.	14.8238
GAPDH	Jurkat Cont.	14.95				TNFAIP3	Jurkat Cont.	6.60877		1
GAPDH	Jurkat Cont.	14.815	14.863	0.0755216		TNFAIP3	Jurkat (A/G)	6.22157	-0.387201	1.30785	0.104675
GAPDH	Jurkat (A/G)	15.547				TNFAIP3	Jurkat (T/C/G)	6.42909	-0.179679	1.13263	0.36953
GAPDH	Jurkat (A/G)	15.3536				IL-Beta	Jurkat Cont.	13.5507		1
GAPDH	Jurkat (A/G)	15.2778	15.3928	0.138827		IL-Beta	Jurkat (A/G)	12.1875	-1.36326	2.57266	0.435496
GAPDH	Jurkat (T/C/G)	16.3857				IL-Beta	Jurkat (T/C/G)	11.1213	-2.42948	5.38699	0.20267
GAPDH	Jurkat (T/C/G)	16.3409				IL-6	Jurkat Cont.	13.4428		1
GAPDH	Jurkat (T/C/G)	16.3208	16.3491	0.0332121		IL-6	Jurkat (A/G)	13.0297	-0.413083	1.33153	0.108498
TNFAIP3	Jurkat Cont.	21.3165				IL-6	Jurkat (T/C/G)	12.7243	-0.718435	1.6454	0.162275
TNFAIP3	Jurkat Cont.	21.4875				IL-8	Jurkat Cont.	11.6655		1
TNFAIP3	Jurkat Cont.	21.6023	21.4688	0.143776	6.60877	IL-8	Jurkat (A/G)	11.0891	-0.576426	1.49115	0.372765
TNFAIP3	Jurkat (A/G)	21.5546				IL-8	Jurkat (T/C/G)	11.1453	-0.520218	1.43417	0.230234
TNFAIP3	Jurkat (A/G)	21.7324				PKR	Jurkat Cont.	6.22174		1
TNFAIP3	Jurkat (A/G)	21.5477	21.6116	0.104675	6.22157	PKR	Jurkat (A/G)	5.57569	-0.646044	1.56487	0.0972858
TNFAIP3	Jurkat (T/C/G)	22.4403				PKR	Jurkat (T/C/G)	5.70613	-0.515607	1.4296	0.0999871
TNFAIP3	Jurkat (T/C/G)	22.7239				IRF-5	Jurkat Cont.	13.7167		1
TNFAIP3	Jurkat (T/C/G)	23.1731	22.7791	0.36953	6.42909	IRF-5	Jurkat (A/G)	13.4226	-0.294128	1.22614	0.299214
IL-Beta	Jurkat Cont.	28.1916				IRF-5	Jurkat (T/C/G)	11.5774	-2.13935	4.40562	0.208223
IL-Beta	Jurkat Cont.	28.1602				CXCL10	Jurkat Cont.	18.9954		1
IL-Beta	Jurkat Cont.	28.8804	28.4107	0.407077	13.5507	CXCL10	Jurkat (A/G)	19.3715	0.376022	0.770559	0.614958
IL-Beta	Jurkat (A/G)	28.0761				CXCL10	Jurkat (T/C/G)	17.123	-1.87244	3.6615	0.398588
IL-Beta	Jurkat (A/G)	27.3847				NF-kB	Jurkat Cont.	6.13587		1
IL-Beta	Jurkat (A/G)	27.2717	27.5775	0.435496	12.1875	NF-kB	Jurkat (A/G)	5.80571	-0.330157	1.25715	0.0706236
IL-Beta	Jurkat (T/C/G)	27.6053				NF-kB	Jurkat (T/C/G)	6.152	0.0161314	0.988881	0.0924608
IL-Beta	Jurkat (T/C/G)	27.2381
IL-Beta	Jurkat (T/C/G)	27.5704	27.4713	0.20267	11.1213
IL-6	Jurkat Cont.	28.5151
IL-6	Jurkat Cont.	28.1876
IL-6	Jurkat Cont.	28.2056	28.3028	0.184082	13.4428
IL-6	Jurkat (A/G)	28.6093
IL-6	Jurkat (A/G)	28.6059
IL-6	Jurkat (A/G)	28.4197	28.545	0.108498	13.0297
IL-6	Jurkat (T/C/G)	28.9402
IL-6	Jurkat (T/C/G)	29.0281
IL-6	Jurkat (T/C/G)	29.2547	29.0743	0.162275	12.7243
IL-8	Jurkat Cont.	26.7854
IL-8	Jurkat Cont.	26.2315
IL-8	Jurkat Cont.	26.5597	26.5255	0.278488	11.6655
IL-8	Jurkat (A/G)	26.0766
IL-8	Jurkat (A/G)	26.8125
IL-8	Jurkat (A/G)	26.5483	26.4791	0.372765	11.0891
IL-8	Jurkat (T/C/G)	27.2549
IL-8	Jurkat (T/C/G)	27.7138
IL-8	Jurkat (T/C/G)	27.5172	27.4953	0.230234	11.1453
PKR	Jurkat Cont.	21.1133
PKR	Jurkat Cont.	21.0434
PKR	Jurkat Cont.	21.0884	21.0817	0.0354195	6.22174
PKR	Jurkat (A/G)	21.064
PKR	Jurkat (A/G)	20.9635
PKR	Jurkat (A/G)	20.8695	20.9657	0.0972858	5.57569
PKR	Jurkat (T/C/G)	21.9869
PKR	Jurkat (T/C/G)	22.0107
PKR	Jurkat (T/C/G)	22.1708	22.0561	0.0999871	5.70613
IRF-5	Jurkat Cont.	28.595
IRF-5	Jurkat Cont.	28.6047
IRF-5	Jurkat Cont.	28.5305	28.5767	0.0403189	13.7167
IRF-5	Jurkat (A/G)	28.7827
IRF-5	Jurkat (A/G)	29.1257
IRF-5	Jurkat (A/G)	28.5295	28.8126	0.299214	13.4226
IRF-5	Jurkat (T/C/G)	27.9198
IRF-5	Jurkat (T/C/G)	27.7121
IRF-5	Jurkat (T/C/G)	28.1503	27.9274	0.21922	11.5774
CXCL10	Jurkat Cont.	33.783
CXCL10	Jurkat Cont.	34.7617
CXCL10	Jurkat Cont.	33.0217	33.8554	0.872256	18.9954
CXCL10	Jurkat (A/G)	35.2661
CXCL10	Jurkat (A/G)	34.0765
CXCL10	Jurkat (A/G)	34.9418	34.7615	0.614958	19.3715
CXCL10	Jurkat (T/C/G)	33.1406
CXCL10	Jurkat (T/C/G)	33.3635
CXCL10	Jurkat (T/C/G)	33.9149	33.473	0.398588	17.123
NF-kB	Jurkat Cont.	21.0662
NF-kB	Jurkat Cont.	20.9093
NF-kB	Jurkat Cont.	21.0121	20.9959	0.0797324	6.13587
NF-kB	Jurkat (A/G)	21.2617
NF-kB	Jurkat (A/G)	21.2043
NF-kB	Jurkat (A/G)	21.1212	21.1957	0.0706236	5.80571
NF-kB	Jurkat (T/C/G)	22.506
NF-kB	Jurkat (T/C/G)	22.5924
NF-kB	Jurkat (T/C/G)	22.4076	22.502	0.0924608	6.152

## Sheet: Jurakt 2
Target	Sample	Cq	Avg. Cq	SD		Target	Sample	Avg Cq	dCq	ddCq	Fold change	SD
GAPDH	Jurkat Cont.	15.3254
GAPDH	Jurkat Cont.	15.5209				GAPDH	Jurkat Cont.	15.3421			1
GAPDH	Jurkat Cont.	15.18	15.3421	0.171059		NF-KB	Jurkat Cont.	20.7934	5.45125		1
GAPDH	Jurkat (A/G)	16.1355				OAS1	Jurkat Cont.	34.0962	18.7541		1
GAPDH	Jurkat (A/G)	16.7093				IL4	Jurkat Cont.	26.487	11.1449		1
GAPDH	Jurkat (A/G)	16.4472	16.4307	0.287273		IL10	Jurkat Cont.	29.7383	14.3961		1
GAPDH	Jurkat (T/C/G)	16.1433				IL12	Jurkat Cont.	29.8316	14.4895		1
GAPDH	Jurkat (T/C/G)	16.5738				IL13	Jurkat Cont.	31.0019	15.6598		1
GAPDH	Jurkat (T/C/G)	16.1367	16.2846	0.250476		TGF-B	SGEC Cont.	18.816	3.47391		1
NF-KB	Jurkat Cont.	20.6114				IRF-1	SGEC Cont.	18.7911	3.44894		1
NF-KB	Jurkat Cont.	20.9703
NF-KB	Jurkat Cont.	20.7983	20.7934	0.179501		GAPDH	Jurkat (A/G)	16.4307			1
NF-KB	Jurkat (A/G)	21.5432				NF-KB	Jurkat (A/G)	21.8742	5.44348	-0.00777374	1.0054	0.288081
NF-KB	Jurkat (A/G)	22.0689				OAS1	Jurkat (A/G)	34.9579	18.5273	-0.226864	1.17029	0.722592
NF-KB	Jurkat (A/G)	22.0103	21.8742	0.288081		IL4	Jurkat (A/G)	27.8287	11.398	-2.99812	7.9896	0.176069
NF-KB	Jurkat (T/C/G)	21.7747				IL10	Jurkat (A/G)	29.3536	12.9229	-1.56663	2.96213	0.294699
NF-KB	Jurkat (T/C/G)	22.0138				IL12	Jurkat (A/G)	28.1877	11.757	-3.90283	14.9578	0.178501
NF-KB	Jurkat (T/C/G)	21.801	21.8631	0.131122		IL13	Jurkat (A/G)	33.5424	17.1117	5.9668	0.0159888	0.964972
OAS1	Jurkat Cont.	34.1945				TGF-B	Jurkat (A/G)	20.0261	3.59542	0.121515	0.919222	0.0760405
OAS1	Jurkat Cont.	34.5709				IRF-1	Jurkat (A/G)	19.891	3.46027	0.0113331	0.992175	0.124394
OAS1	Jurkat Cont.	33.5234	34.0962	0.530599
OAS1	Jurkat (A/G)	34.6659
OAS1	Jurkat (A/G)	35.7809				GAPDH	Jurkat (T/C/G)	16.2846			1
OAS1	Jurkat (A/G)	34.4271	34.9579	0.722592		NF-KB	Jurkat (T/C/G)	21.8631	5.57851	0.127261	0.915568	0.131122
OAS1	Jurkat (T/C/G)					OAS1	Jurkat (T/C/G)	34.3669	18.0823	-0.67185	1.59311	0.0773474
OAS1	Jurkat (T/C/G)	34.4216				IL4	Jurkat (T/C/G)	27.7712	11.4866	-2.90958	7.51402	0.0505489
OAS1	Jurkat (T/C/G)	34.3122	34.3669	0.0773474		IL10	Jurkat (T/C/G)	27.9908	11.7062	-2.7833	6.88423	0.168393
IL10	Jurkat Cont.	30.0862				IL12	Jurkat (T/C/G)	27.682	11.3974	-4.26244	19.1921	0.0396119
IL10	Jurkat Cont.	29.7733				IL13	Jurkat (T/C/G)	32.5284	16.2438	5.09889	0.0291797	0.913426
IL10	Jurkat Cont.	29.3553	29.7383	0.366721		TGF-B	Jurkat (T/C/G)	20.3037	4.0191	0.545194	0.685299	0.123996
IL10	Jurkat (A/G)	29.0256				IRF-1	Jurkat (T/C/G)	19.7517	3.46706	0.0181208	0.987518	0.160481
IL10	Jurkat (A/G)	29.5962
IL10	Jurkat (A/G)	29.4388	29.3536	0.294699
IL10	Jurkat (T/C/G)	27.9048
IL10	Jurkat (T/C/G)	28.1849
IL10	Jurkat (T/C/G)	27.8829	27.9908	0.168393
IL12	Jurkat Cont.	30.0411
IL12	Jurkat Cont.	29.8078
IL12	Jurkat Cont.	29.6459	29.8316	0.198674
IL12	Jurkat (A/G)	28.0708
IL12	Jurkat (A/G)	28.3931
IL12	Jurkat (A/G)	28.099	28.1877	0.178501
IL12	Jurkat (T/C/G)	27.7091
IL12	Jurkat (T/C/G)	27.6365
IL12	Jurkat (T/C/G)	27.7003	27.682	0.0396119
IL13	Jurkat Cont.	31.3232
IL13	Jurkat Cont.	31.1486
IL13	Jurkat Cont.	30.534	31.0019	0.414548
IL13	Jurkat (A/G)	34.6082
IL13	Jurkat (A/G)	32.728
IL13	Jurkat (A/G)	33.2908	33.5424	0.964972
IL13	Jurkat (T/C/G)	33.1743
IL13	Jurkat (T/C/G)	31.8825
IL13	Jurkat (T/C/G)		32.5284	0.913426
IL4	Jurkat Cont.	26.2785
IL4	Jurkat Cont.	26.6544
IL4	Jurkat Cont.	26.5281	26.487	0.191284
IL4	Jurkat (A/G)	27.6997
IL4	Jurkat (A/G)	28.0293
IL4	Jurkat (A/G)	27.7571	27.8287	0.176069
IL4	Jurkat (T/C/G)	27.7899
IL4	Jurkat (T/C/G)	27.8097
IL4	Jurkat (T/C/G)	27.7139	27.7712	0.0505489

## Sheet: Jurkat 3
Target	Sample	Cq	Avg. Cq	SD
TGF-B	Jurkat Cont.	18.9049
TGF-B	Jurkat Cont.	18.7962
TGF-B	Jurkat Cont.	18.747	18.816	0.0807546
TGF-B	Jurkat (A/G)	20.1035
TGF-B	Jurkat (A/G)	20.0234
TGF-B	Jurkat (A/G)	19.9515	20.0261	0.0760405
TGF-B	Jurkat (T/C/G)	20.1731
TGF-B	Jurkat (T/C/G)	20.4197
TGF-B	Jurkat (T/C/G)	20.3184	20.3037	0.123996
IRF-1	Jurkat Cont.	19.0704
IRF-1	Jurkat Cont.	18.5965
IRF-1	Jurkat Cont.	18.7063	18.7911	0.24803
IRF-1	Jurkat (A/G)	19.8547
IRF-1	Jurkat (A/G)	20.0295
IRF-1	Jurkat (A/G)	19.7888	19.891	0.124394
IRF-1	Jurkat (T/C/G)	19.5824
IRF-1	Jurkat (T/C/G)	19.9016
IRF-1	Jurkat (T/C/G)	19.7711	19.7517	0.160481
