# Supplementary material for: CRISPR-Cas9 editing of TNFAIP3 variants in salivary gland epithelial cells to study Sjögren’s disease pathogenesis
Source: Front Genome Ed. 2025 Jul 23;7:1625393. doi: 10.3389/fgeed.2025.1625393 (PMC12326134; doi:10.3389/fgeed.2025.1625393)
Supplement: Supplementary file 2 [file Table1.xlsx]

## Sheet: Sheet1
Fluor	Target	Sample	Cq	Cq Mean	Cq Std. Dev		Fluor	Target	Sample	Cq Mean	Cq Std. Dev	dCq	ddCq	Fold Change
SYBR	GAPDH	Control G/C/T	20.2863				SYBR	GAPDH	Control G/C/T	20.3776	0.0990463
SYBR	GAPDH	Control G/C/T	20.4829				SYBR	GAPDH	rs2230926 G/C/T	20.4826	0.154253
SYBR	GAPDH	Control G/C/T	20.3637	20.3776	0.0990463		FAM	rs926	Control G/C/T	25.332	0.39714	4.95442		1
SYBR	GAPDH	926 G/C/T	20.3099				FAM	rs926	rs2230926 G/C/T	24.962	0.376048	4.47944	-0.474981	1.3899
SYBR	GAPDH	926 G/C/T	20.6067				ROX	G Probe	Control G/C/T	13.9776	1.21416	-6.39996		1
SYBR	GAPDH	926 G/C/T	20.5312	20.4826	0.154253		ROX	G Probe	rs2230926 G/C/T	7.75375	4.67734	-12.7289	-6.32889	80.387
FAM	rs926	Control G/C/T	24.8872				VIC	C Probe	Control G/C/T	33.5164	0.199139	13.1388		1
FAM	rs926	Control G/C/T	25.651				VIC	C Probe	rs2230926 G/C/T	23.7325	0.276296	3.24986	-9.88895	948.139
FAM	rs926	Control G/C/T	25.4579	25.332	0.39714		SYBR	T Probe	Control G/C/T	28.2384	0.0684719	7.86075		1
FAM	rs926	926 G/C/T	24.8054				SYBR	T Probe	rs2230926 G/C/T	28.6714	0.482268	8.18878	0.328027	0.796625
FAM	rs926	926 G/C/T	24.6897											1
FAM	rs926	926 G/C/T	25.3911	24.962	0.376048		SYBR	GAPDH	Control A/G	20.3776	0.0990463			1
ROX	G Probe	Control G/C/T					SYBR	GAPDH	rs6920220 A/G	20.7089	0.356646			1
ROX	G Probe	Control G/C/T	14.8362				FAM	rs220	Control A/G	21.3064	0.0704095	0.928748		1
ROX	G Probe	Control G/C/T	13.1191	13.9776	1.21416		FAM	rs220	rs6920220 A/G	21.6671	0.213435	0.958254	0.0295068	0.979755
ROX	G Probe	926 G/C/T	22.0025				ROX	WT.	Control A/G	19.6128	0.370604	-0.764851		1
ROX	G Probe	926 G/C/T					ROX	WT.	rs6920220 A/G	20.1224	0.272741	-0.58646	0.17839	0.883688
ROX	G Probe	926 G/C/T	11.756	16.8792	7.24535		VIC	Mut.	Control A/G	33.5164	0.199139	13.1388		1
VIC	C Probe	Control G/C/T	33.6572				VIC	Mut.	rs6920220 A/G	22.3967	0.517534	1.68785	-11.451	2799.53
VIC	C Probe	Control G/C/T	33.3756
VIC	C Probe	Control G/C/T		33.5164	0.199139
VIC	C Probe	926 G/C/T	7.71997
VIC	C Probe	926 G/C/T	7.64014
VIC	C Probe	926 G/C/T		7.68006	0.0564441
SYBR	T Probe	Control G/C/T	28.2282
SYBR	T Probe	Control G/C/T	28.3113
SYBR	T Probe	Control G/C/T	28.1755	28.2384	0.0684719
SYBR	T Probe	926 G/C/T	28.418
SYBR	T Probe	926 G/C/T	29.2275
SYBR	T Probe	926 G/C/T	28.3686	28.6714	0.482268
SYBR	GAPDH	Control A/G	20.2863
SYBR	GAPDH	Control A/G	20.4829
SYBR	GAPDH	Control A/G	20.3637	20.3776	0.0990463
SYBR	GAPDH	220 A/G	21.1176
SYBR	GAPDH	220 A/G	20.4611
SYBR	GAPDH	220 A/G	20.5479	20.7089	0.356646
FAM	rs220	Control A/G	21.3107
FAM	rs220	Control A/G	21.3745
FAM	rs220	Control A/G	21.2339	21.3064	0.0704095
FAM	rs220	220 A/G	21.7099
FAM	rs220	220 A/G	21.4355
FAM	rs220	220 A/G	21.8559	21.6671	0.213435
ROX	WT.	Control A/G	19.2819
ROX	WT.	Control A/G	20.0132
ROX	WT.	Control A/G	19.5432	19.6128	0.370604
ROX	WT.	220 A/G	19.8406
ROX	WT.	220 A/G	20.1416
ROX	WT.	220 A/G	20.385	20.1224	0.272741
VIC	Mut.	Control A/G	33.6572
VIC	Mut.	Control A/G	33.3756
VIC	Mut.	Control A/G		33.5164	0.199139
VIC	Mut.	220 A/G	21.925
VIC	Mut.	220 A/G	22.9503
VIC	Mut.	220 A/G	22.3149	22.3967	0.517534
