# Supplementary material for: CRISPR-Cas9 editing of TNFAIP3 variants in salivary gland epithelial cells to study Sjögren’s disease pathogenesis
Source: Frontiers journal article supplement (doi:10.3389/fgeed.2025.1625393), 2025-07-23
Supplement: Table_1.docx [file Table_1.docx]

| **Product or Sequence Name** | **Sequence** |
| --- | --- |
| rs6920220 Alt-R HDR Donor (+) | ATCTGCTTCCATCTGTTAGCAGGTAACTTCTCCACTAAAAAGATATGGTTCTGTAGAACAATGGCATATGCAGACAGTGATC |
| rs6920220 Alt-R HDR Donor (-) | GATCACTGTCTGCATATGCCATTGTTCTACAGAACCATATCTTTTTAGTGGAGAAGTTACCTGCTAACAGATGGAAGCAGAT |
| rs6920220 gRNA | ACTTCTCCACTAAAAGGATA |
| rs2230926 Alt-R HDR Donor (+) | GGCGTTCAGGACACAGACTTGGTACTGAGGAAGGCGCTGTGCAGCACGCTCAAGGAAACAGACACACGCAACTTTAAATTCCGCTGGCA |
| rs2230926 Alt-R HDR Donor (-) | TGCCAGCGGAATTTAAAGTTGCGTGTGTCTGTTTCCTTGAGCGTGCTGCACAGCGCCTTCCTCAGTACCAAGTCTGTGTCCTGAACGCC |
| rs2230926 gRNA | GGCGCTGTTCAGCACGCTCA |
| rs6920220 Forward Primer | TACGGCAGCGTAACATAGTA |
| rs6920220 Reverse Primer | GTCTGCATATGCCATTGTTCTA |
| rs6920220 WT Probe | TAAA+A+G+GA+TA+T+GGT |
| rs6920220 Mut Probe | TCT+C+CA+CTAAA+A+A+GA |
| rs2230926 Forward Primer | CATGCCACTTCTCAGTACATG |
| rs2230926 Reverse Primer | CGTGTGTCTGTTTCCTTGAG |
| rs2230926 T Probe | TG+CT+G+A+AC+AGCG |
| rs2230926 C Probe | TGCT+G+G+A+CAGC |
| rs2230926 G Probe | TGCT+G+C+A+CA+GC |
