# Supplementary material for: CRISPR-Cas9 editing of TNFAIP3 variants in salivary gland epithelial cells to study Sjögren’s disease pathogenesis
Source: Frontiers journal article supplement (doi:10.3389/fgeed.2025.1625393), 2025-07-23
Supplement: Table_2.docx [file Table_2.docx]

| **Sequence Name** | **Sequence (5’---3’)** |
| --- | --- |
| GAPDH Forward primer | AGCCACATCGCTCAGACAC |
| GAPDH Reverse primer | GCCCAATACGACCAAATCC |
| IRF1 Forward primer | GCACCAGTGATCTGTACAAC |
| IRF1 Reverse primer | GCTCCTCCTTACAGCTAAAG |
| IRF5 Forward primer | GGCCTTGGCTTGAAAACTGG |
| IRF5 Reverse primer | ATGCGGTCTTTGAGGTCTGG |
| NFKB2 Forward primer | TCCCAGATGTAGTGCTGCTG |
| NFKB2 Reverse primer | AAGGCCAATACGTGGTGAAG |
| TNFAIP3 Forward primer | GCCAAGAGAGATCACACCCC |
| TNFAIP3 Reverse primer | TTCGTTTTCAGCGCCACAAG |
| IL4 Forward primer | GCCTTCAGCACATCTTCACA |
| IL4 Reverse primer | ATCATCGCTTCTCTGCACCT |
| IL6 Forward primer | GGCTGCTCCTGGTGTTGC |
| IL6 Reverse primer | TCTGAAGAGGTGAGTGGCTGTC |
| IL8 Forward primer | CAGTTTTGCCAAGAAGTGCTAAAG |
| IL8 Reverse primer | GGGTGGAAAGGTTTGGAGTATGTC |
| IL10 Forward primer | GCCCCTGCTCTCACCTTAAA |
| IL10 Reverse primer | GGGCATCAAAAAGACCGCAT |
| IL12 Forward primer | GGCAGTCTGTGGGGAAGAAC |
| IL12 Reverse primer | CAGATGGCTTGCCTTAGGTCT |
| IL13 Forward primer | AGGCAAGCCAAAAGAAGTGA |
| IL13 Reverse primer | CCAACTCTGAGCTCCTGTCC |
| IL-1Beta Forward primer | GCAGTCTACACAGCTTCGGG |
| IL-1Beta Reverse primer | CCGCCTCAGCCTCCCAAAG |
| PKR Forward primer | TCTTCATGTATGTGACACTGC |
| PKR Reverse primer | CACACAGTCAAGGTCCTT |
| Oas1 Forward primer | TGCATCAGGAGGTGGAGTTTG |
| Oas1 Reverse primer | ATAGATTCTGGGATCAGGCTTGC |
| CXCL10 Forward primer | ATGACGGGCCAGTGAGAATG |
| CXCL10 Reverse primer | TCAACACGTGGGCAGGATAG |
